# Supplementary material for: Fingerprint of semi-crystalline structure memory in the thermal and ionic conduction properties of amorphous ureasil–polyether hybrid solid electrolytes
Source: Royal Society of Chemistry journal article supplement (doi:10.1039/d1ra09138g), 2022-01-01
Supplement: d1ra09138g1.pdf [file d1ra09138g1.pdf]

## Supporting Information

### **Fingerprint of semi-crystalline structure memory in the thermal and ionic conduction properties of amorphous ureasil-polyether hybrid solid electrolytes**

Gustavo Palácio †, Sandra H. Pulcinelli †, Celso V. Santilli †\*

† Chemistry Institute of the São Paulo State University – UNESP, 14800-060 Araraquara, São Paulo, Brazil.

Corresponding author. Phone: +55-016-3301-9546. fax: +55-016-3322-2308

E-mail: cv.santilli@unesp.br

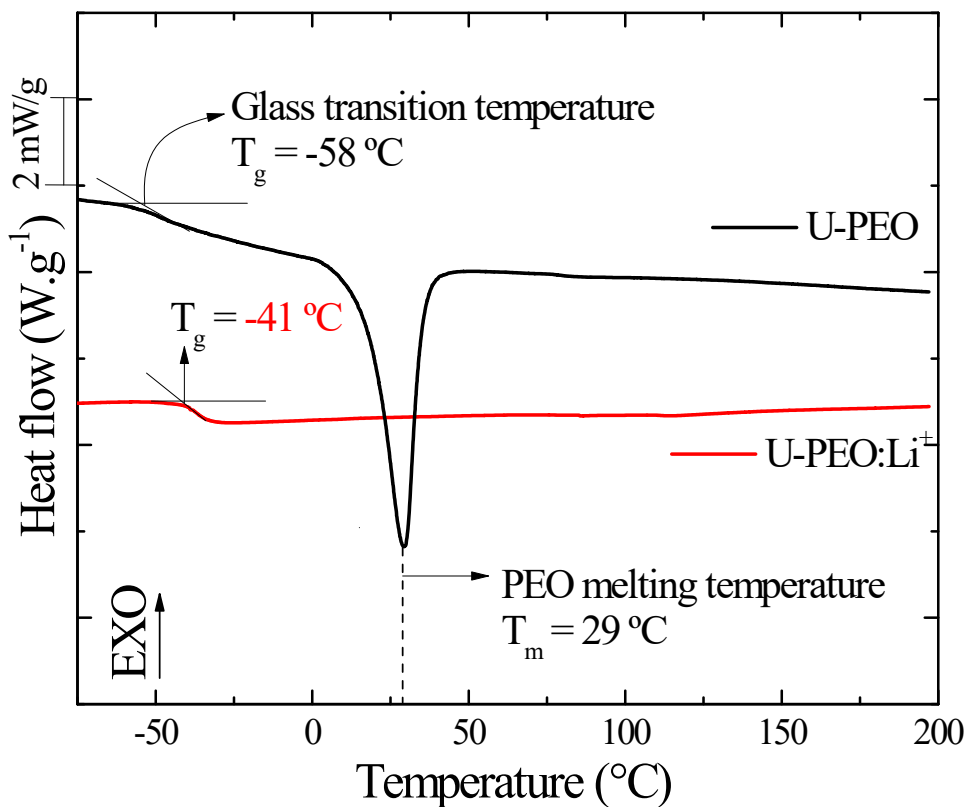

**Figure SI.1:** DSC curves of U-PEO and of U-PEO: $\text{Li}^+$  samples.

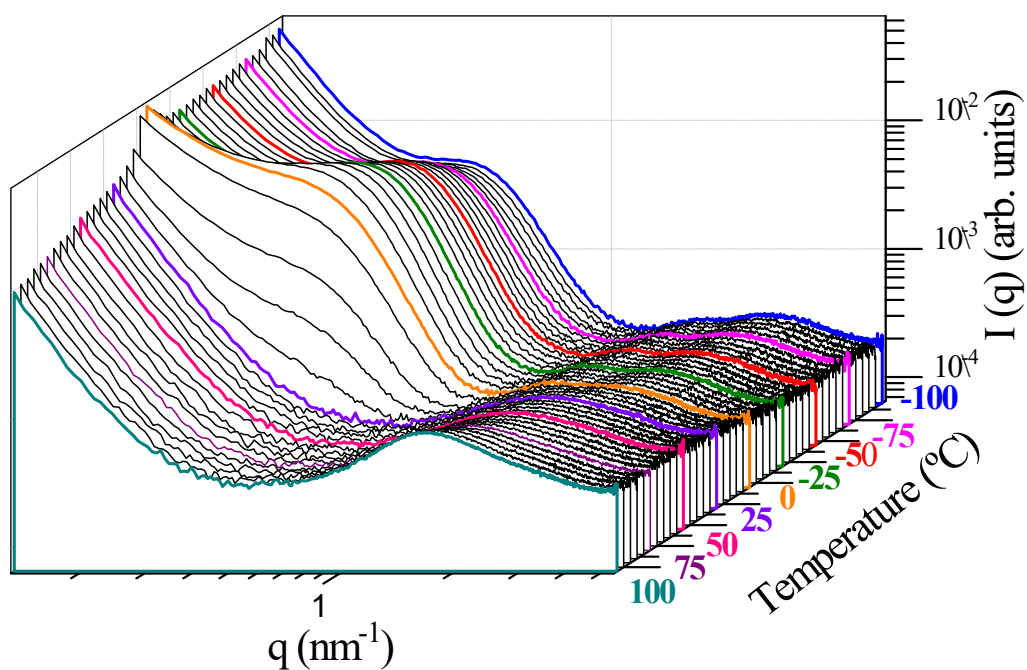

**Figure SI.2:** Stacked log-log SAXS curves for U-PEO, as a function of temperature, recorded in situ during heating from 100  $^\circ\text{C}$  to -100  $^\circ\text{C}$ .

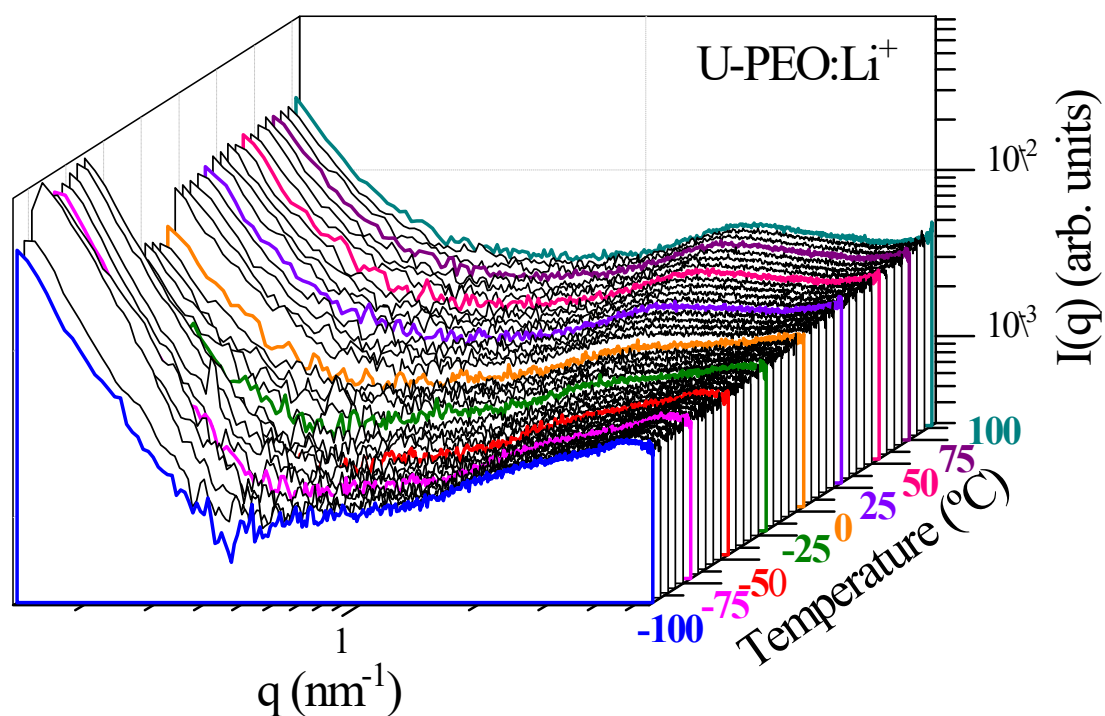

**Figure SI.3:** Stacked log-log SAXS curves for U-PEO:Li<sup>+</sup>, as a function of temperature, recorded *in situ* during heating from -100 °C to 100 °C.

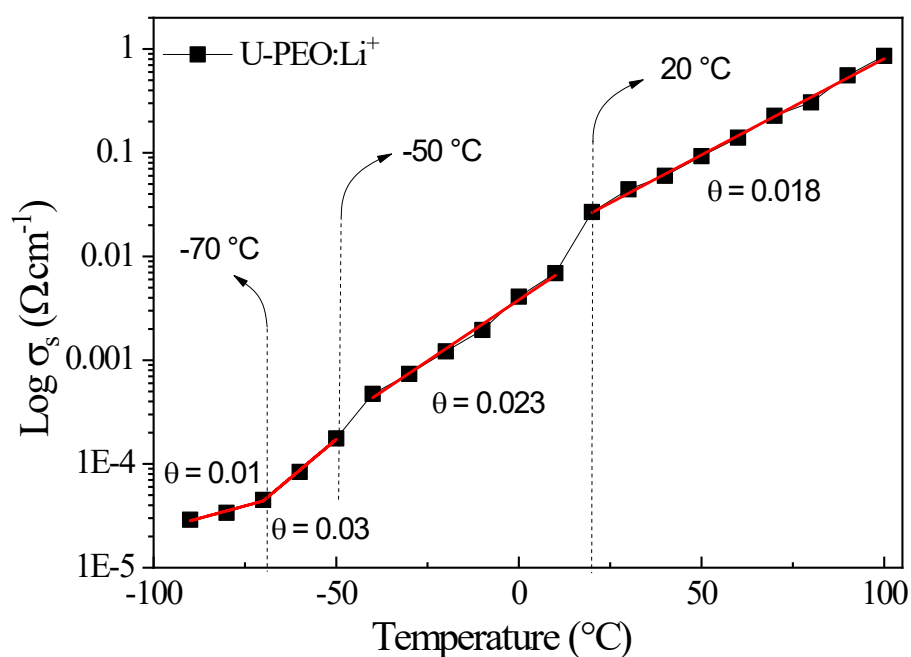

**Figure SI.4:** Logarithmic dependency of conductivity with temperature of the U-PEO:Li<sup>+</sup>.
